# Supplementary material
Source: HighWire-hosted journal article supplement (doi:10.1101/rna.080481.125)

Suppl Figure 1

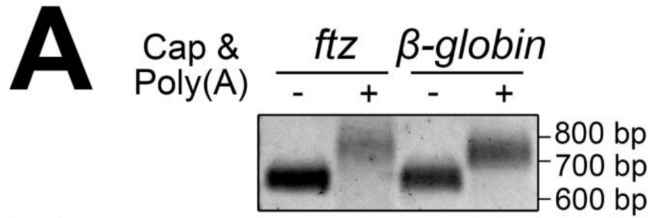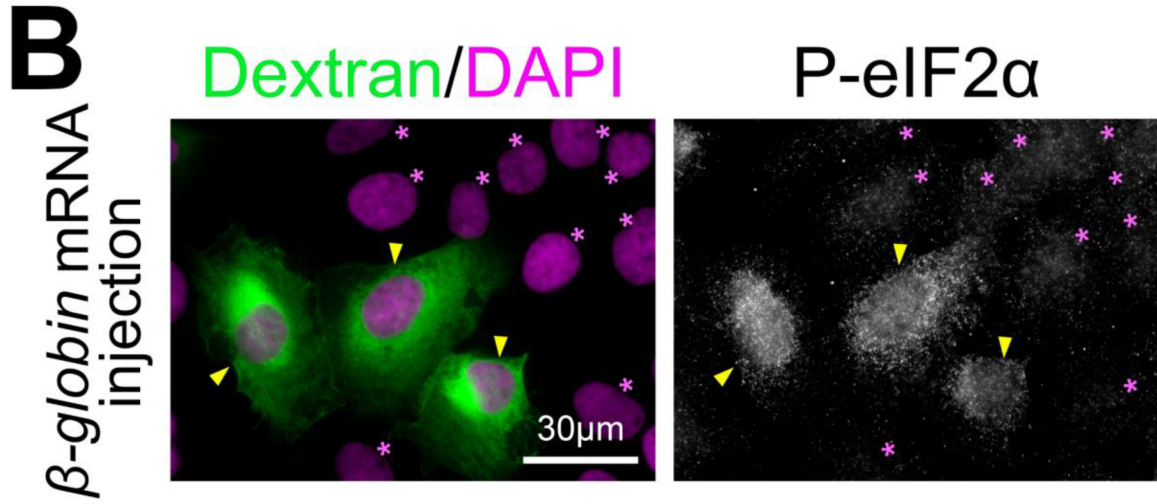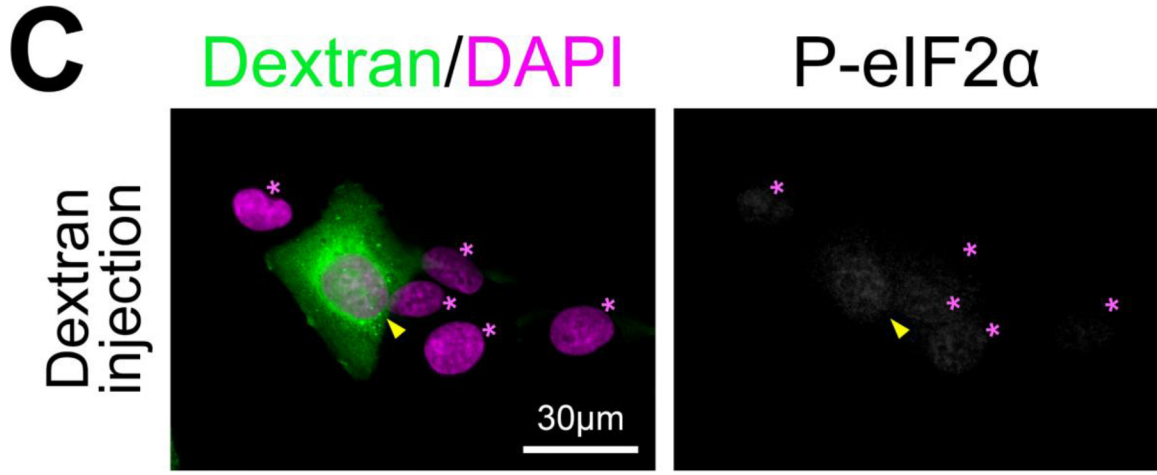

Supplement: Supplemental_Figure_S1.pdf [file Supplemental_Figure_S1.pdf]

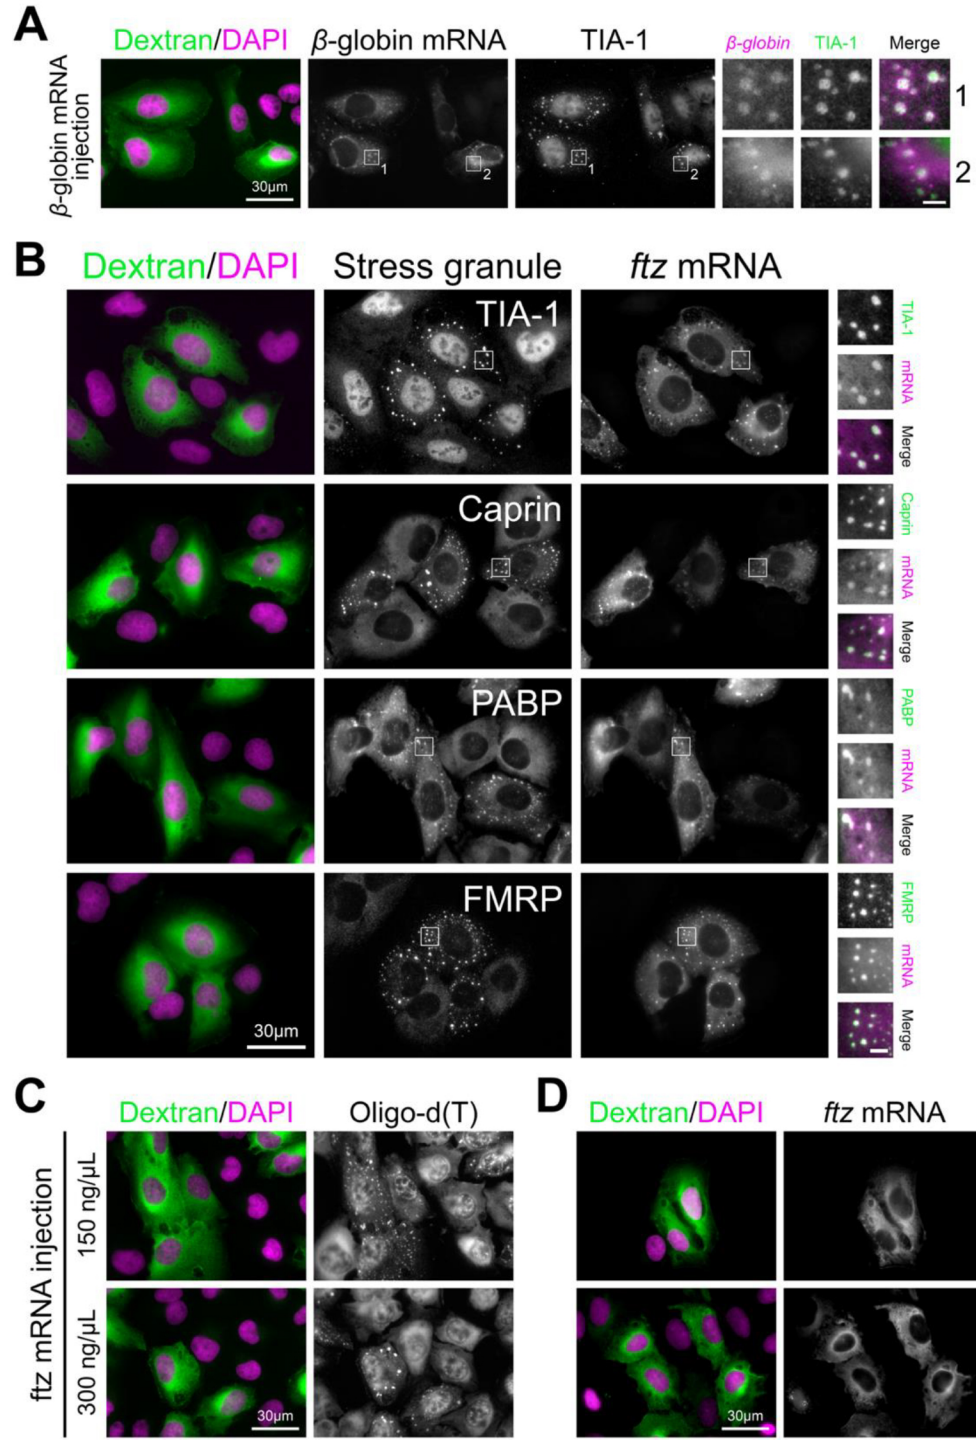

Supplement: Supplemental_Figure_S2.pdf [file Supplemental_Figure_S2.pdf]

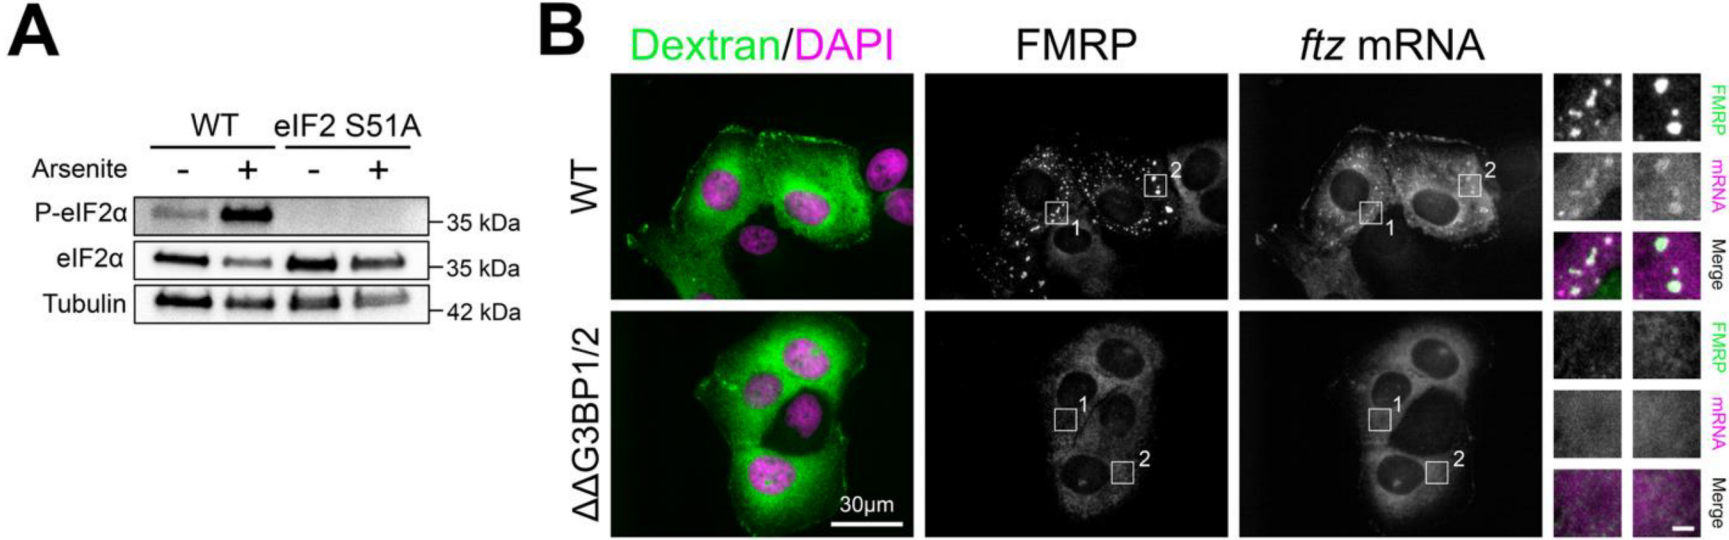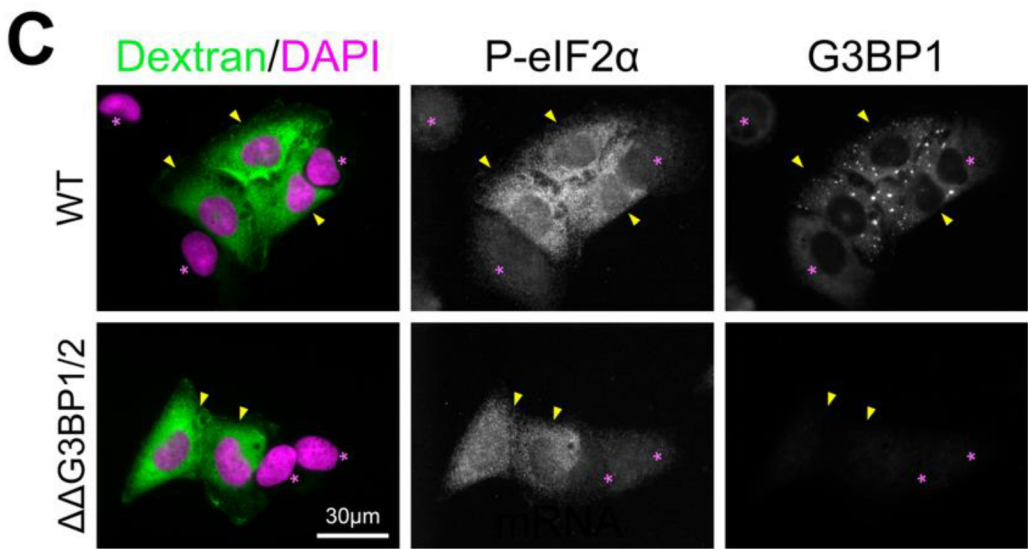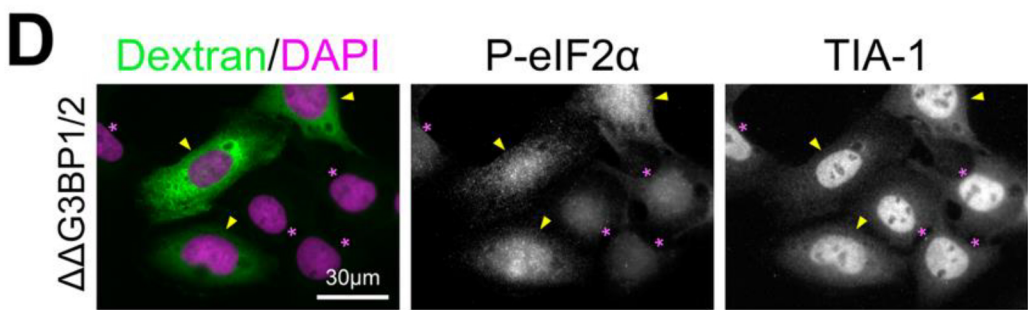

Supplement: Supplemental_Figure_S3.pdf [file Supplemental_Figure_S3.pdf]

# Suppl Figure 4

## A - RNaselll

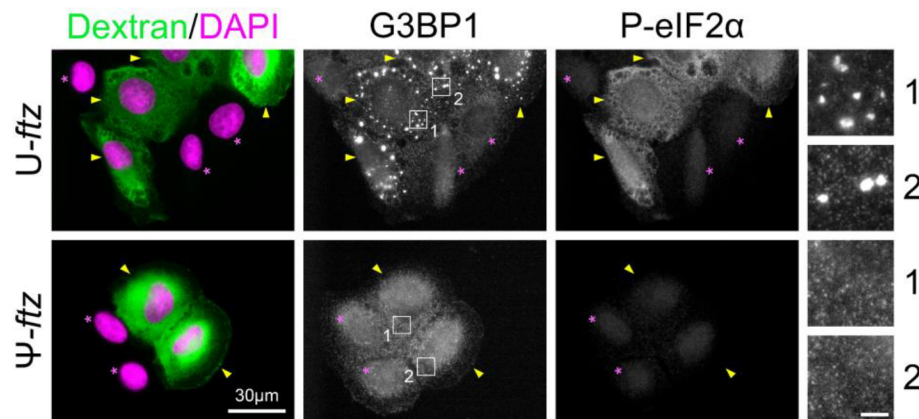

## B + RNaselll

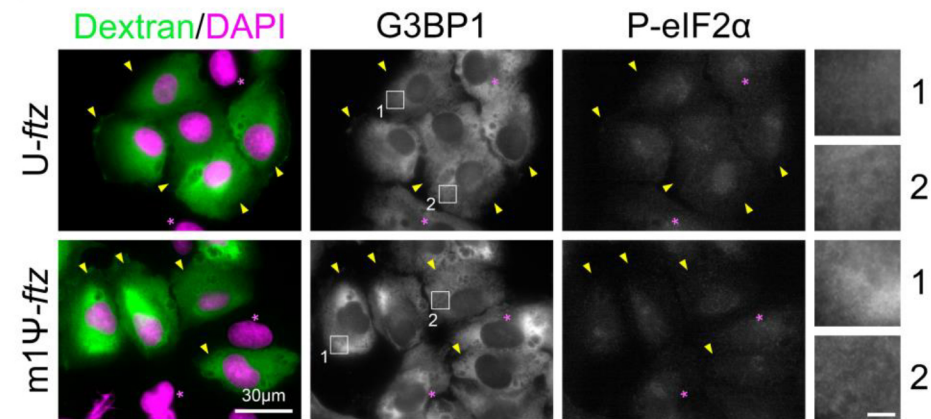

## C

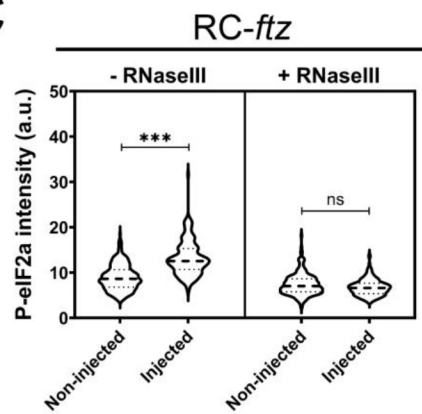

## D

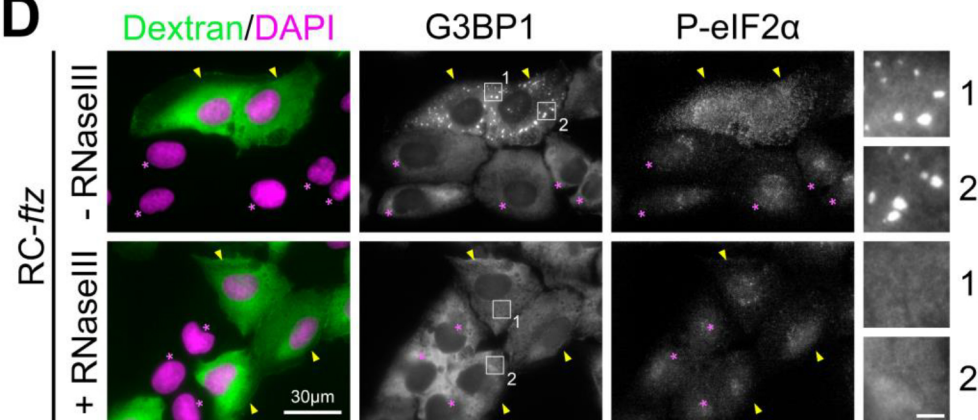

## E

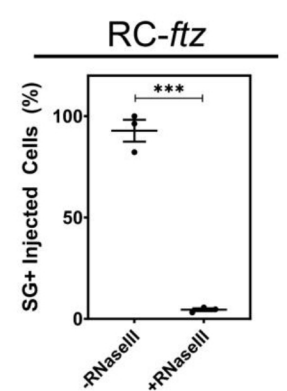

Supplement: Supplemental_Figure_S4.pdf [file Supplemental_Figure_S4.pdf]

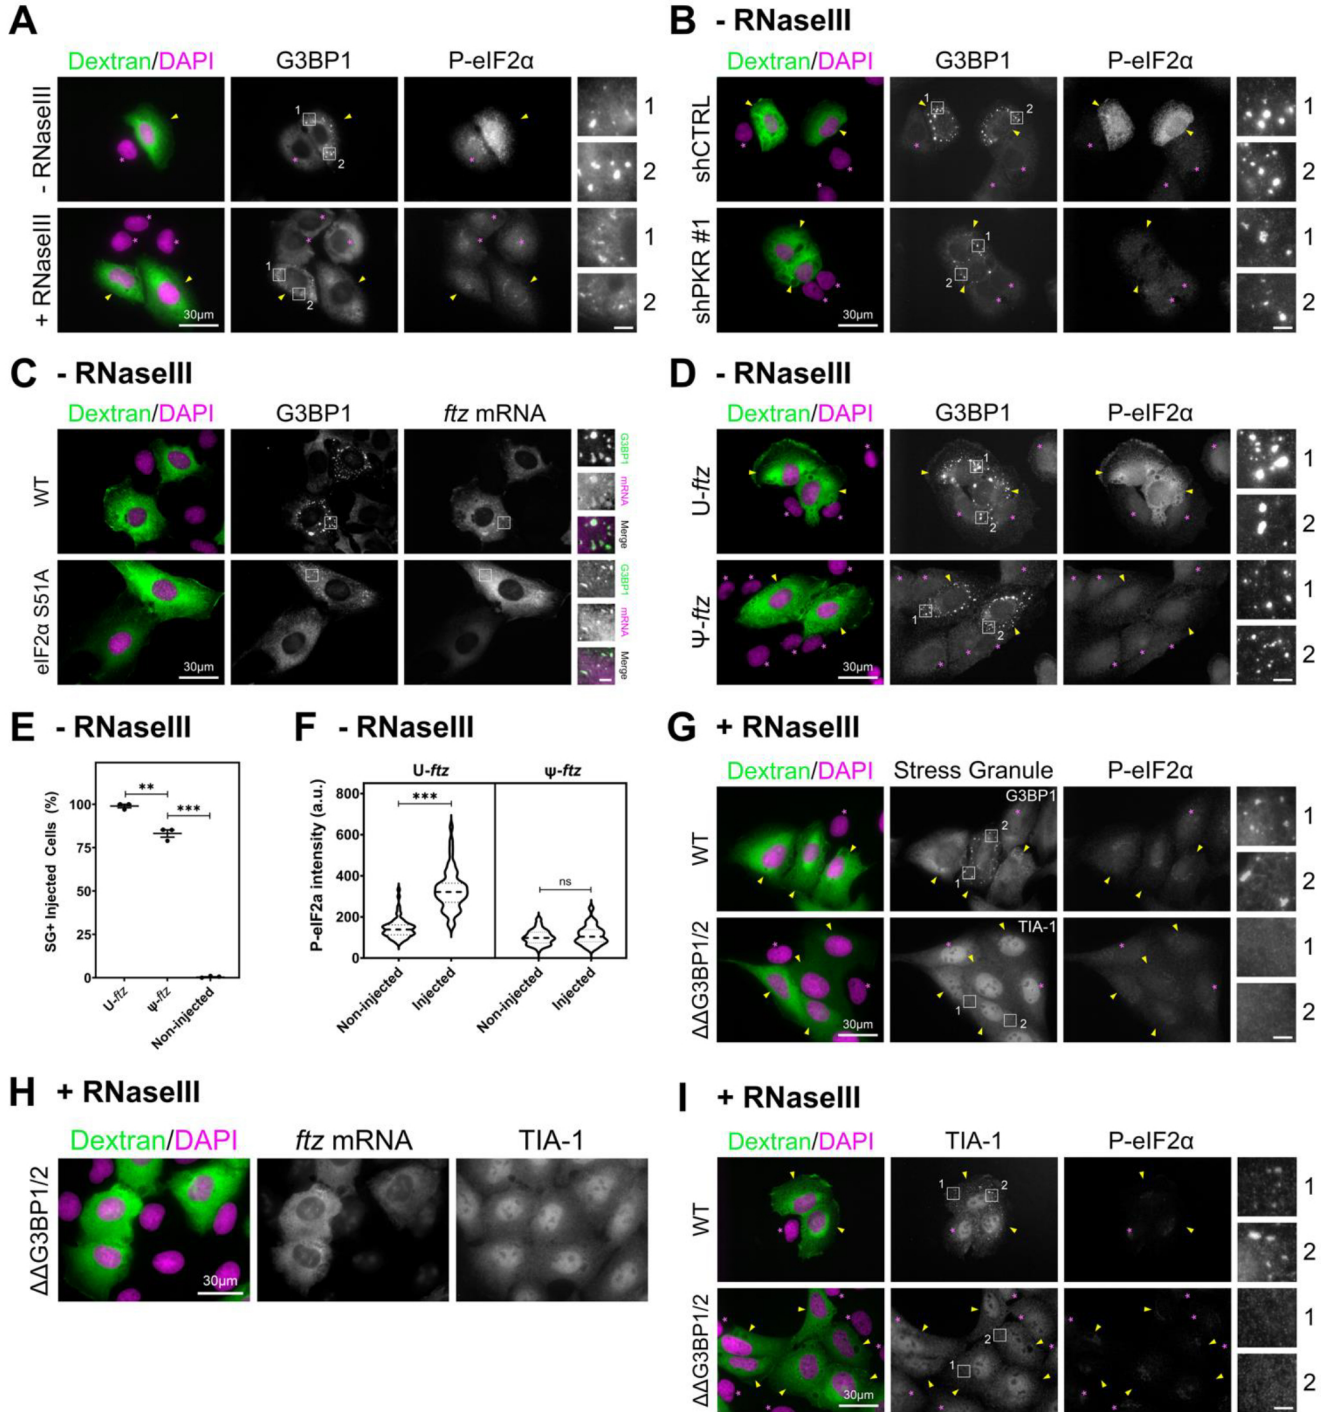

Supplement: Supplemental_Figure_S5.pdf [file Supplemental_Figure_S5.pdf]
